# Supplementary material for: Radioprotective Effect of Whey Hydrolysate Peptides against γ-Radiation-Induced Oxidative Stress in BALB/c Mice
Source: MDPI journal article supplement (doi:10.3390/nu13030816), 2021-03-02
Supplement: s1 [file s1]

Supplementary File 1.

Table S1. Daily protein intake in each group per mice (g).

| Group           | The amount of protein supplemented | During pre-feeding period |                      | During the 1st week of irradiation |                      | During the 2nd week of irradiation |                      |
|-----------------|------------------------------------|---------------------------|----------------------|------------------------------------|----------------------|------------------------------------|----------------------|
|                 |                                    | Protein provided in feed  | Total protein intake | Protein provided in feed           | Total protein intake | Protein provided in feed           | Total protein intake |
| Vehicle control | -                                  | 2.562                     | 2.562                | 2.712                              | 2.712                | 2.022                              | 2.022                |
| IR control      | -                                  | 2.075                     | 2.075                | 2.671                              | 2.671                | 0.675                              | 0.675                |
| IR+Whey         | 0.036                              | 2.148                     | 2.184                | 2.710                              | 2.746                | 1.592                              | 1.628                |
| IR+WHPs-L       | 0.007                              | 2.091                     | 2.098                | 2.683                              | 2.691                | 1.371                              | 1.378                |
| IR+WHPs-M       | 0.036                              | 2.106                     | 2.142                | 2.679                              | 2.715                | 1.628                              | 1.664                |
| IR+WHPs-H       | 0.072                              | 2.096                     | 2.168                | 2.578                              | 2.650                | 1.267                              | 1.339                |

The protein content in the feed is estimated based on the actual food intake of the mice.
